# Supplementary material
Source: ML conference proceedings conference paper supplement (https://aclanthology.org/D19-1002)
Supplement: Attachment [file supplementary_material.pdf › supplementary_material.pdf]

## A Compute and Environment

We estimate roughly 250 model training commands were executed for this study, running for a range of 10-120 minutes each, nearly all on a single local NVIDIA Tesla K40 GPU. The state of Georgia generates electricity from mostly Gas (43%) and nuclear (30%) resources; 9% from renewables.<sup>9</sup>

## B All Results on Adversarial Setup

Table 5 presents results for all  $\lambda$  settings tested for the trained adversary experiment performed in §4. No post-selection was made, as these are all test set results.

## C TVD/JSD Tradeoff by Class

Figure 6 breaks down the scatterplots from Figure 5 into those pertaining to each data class. We note the unique, near-concave shape of the positive class in the Diabetes dataset, which is a detection-type set biased towards the negative class. This is the setting where we would expect adversarial distributions to be most difficult to find, which is confirmed by this curve.

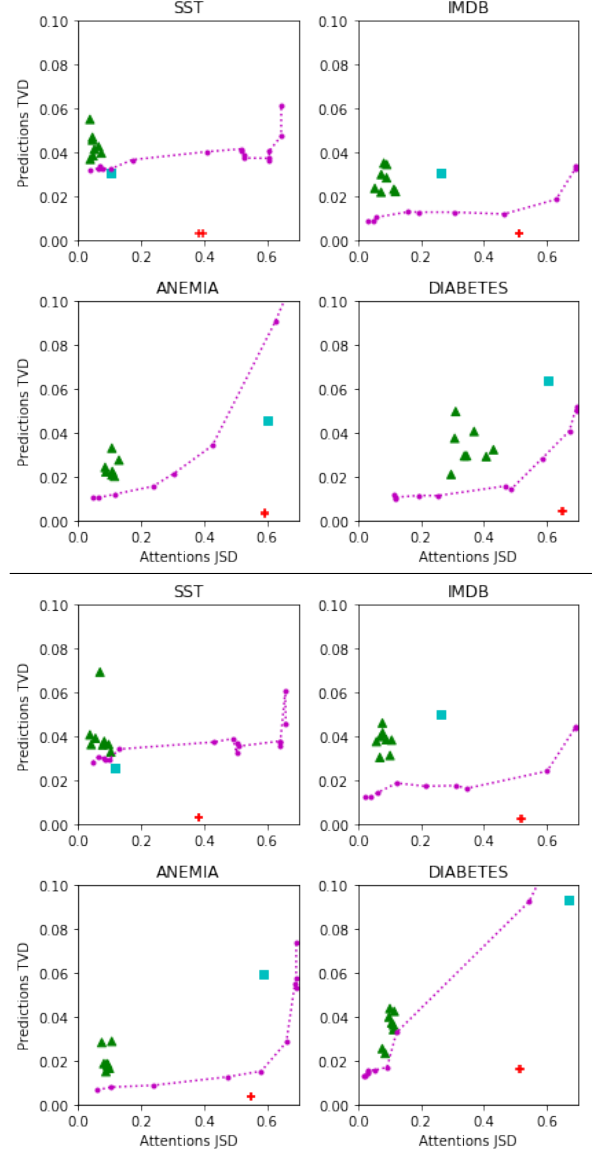

Figure 6: Per-instance test set JSD and TVD from base model on negative instances (top) and positive instances (bottom).  $\blacktriangle$ : random seed;  $\blacksquare$ : uniform weights; dotted line: our adversarial setup;  $+$ : adversarial setup from Jain and Wallace (2019).

<sup>9</sup><https://www.eia.gov/state/data.php?sid=GA#EnergyIndicators>

| Dataset | $\lambda$ | F1    | TVD   | JSD   | Dataset  | $\lambda$ | F1    | TVD   | JSD   |
|---------|-----------|-------|-------|-------|----------|-----------|-------|-------|-------|
| Anemia  | 0         | 0.936 | 0.008 | 0.056 | Diabetes | 0         | 0.779 | 0.012 | 0.098 |
|         | 1e-4      | 0.937 | 0.009 | 0.090 |          | 1e-5      | 0.769 | 0.011 | 0.098 |
|         | 2e-4      | 0.938 | 0.010 | 0.194 |          | 2e-5      | 0.770 | 0.011 | 0.098 |
|         | 3.5e-4    | 0.936 | 0.014 | 0.387 |          | 4e-5      | 0.780 | 0.012 | 0.162 |
|         | 5e-4      | 0.942 | 0.017 | 0.481 |          | 5e-5      | 0.781 | 0.012 | 0.209 |
|         | 0.001     | 0.938 | 0.030 | 0.576 |          | 1e-4      | 0.781 | 0.016 | 0.385 |
|         | 0.002     | 0.895 | 0.068 | 0.666 |          | 2e-4      | 0.775 | 0.015 | 0.409 |
|         | 0.004     | 0.888 | 0.074 | 0.690 |          | 5e-4      | 0.759 | 0.029 | 0.494 |
|         | 0.005     | 0.875 | 0.079 | 0.692 |          | 0.001     | 0.690 | 0.051 | 0.646 |
|         | 0.01      | 0.872 | 0.086 | 0.693 |          | 0.005     | 0.645 | 0.067 | 0.693 |
| SST     | 0         | 0.816 | 0.032 | 0.075 | IMDb     | 0         | 0.906 | 0.011 | 0.043 |
|         | 1e-5      | 0.822 | 0.030 | 0.042 |          | 1e-4      | 0.907 | 0.011 | 0.027 |
|         | 5e-5      | 0.824 | 0.031 | 0.080 |          | 2e-4      | 0.906 | 0.012 | 0.059 |
|         | 1e-4      | 0.823 | 0.032 | 0.064 |          | 4e-4      | 0.906 | 0.015 | 0.202 |
|         | 5e-4      | 0.828 | 0.031 | 0.100 |          | 5e-4      | 0.905 | 0.016 | 0.141 |
|         | 5.2e-4    | 0.827 | 0.036 | 0.150 |          | 7e-4      | 0.902 | 0.015 | 0.309 |
|         | 5.25e-4   | 0.823 | 0.036 | 0.514 |          | 8e-4      | 0.906 | 0.014 | 0.405 |
|         | 5.35e-4   | 0.814 | 0.039 | 0.420 |          | 0.001     | 0.905 | 0.022 | 0.615 |
|         | 5.5e-4    | 0.809 | 0.040 | 0.505 |          | 0.005     | 0.888 | 0.038 | 0.691 |
|         | 6e-4      | 0.813 | 0.039 | 0.513 |          | 0.01      | 0.885 | 0.039 | 0.691 |
|         | 7.5e-4    | 0.811 | 0.037 | 0.518 |          |           |       |       |       |
|         | 0.001     | 0.815 | 0.038 | 0.623 |          |           |       |       |       |
|         | 0.01      | 0.821 | 0.036 | 0.624 |          |           |       |       |       |
|         | 0.1       | 0.811 | 0.047 | 0.653 |          |           |       |       |       |
|         | 0.5       | 0.799 | 0.061 | 0.652 |          |           |       |       |       |
|         | 1         | 0.819 | 0.039 | 0.624 |          |           |       |       |       |

Table 5: All results for the Adversarial Setup.  $\lambda = 0$  denotes a model where only minimum TVD is sought. SST models were trained for 80 epochs with best epoch selected based on loss objective over the test set; all other models for 40 epochs.
